# Supplementary material for: Hierarchical rough surfaces formed by LBL self-assembly for oil–water separation
Source: Royal Society of Chemistry journal article supplement (doi:10.1039/c4ta01569j), 2014-01-01
Supplement: c4ta01569j1.pdf [file c4ta01569j1.pdf]

## Hierarchical Rough Surfaces Formed by LBL Self-assembly for Oil/Water Separation

Xiaoyu Li, Dan Hu, Kun Huang, and Chuanfang Yang\*

Key Laboratory of Green Process and Engineering, Institute of Process Engineering,  
Chinese Academy of Sciences, Beijing 100190, China

\* Corresponding author.

Tel/Fax: +86 10 82544976.

E-mail: cfyang@home.ipe.ac.cn

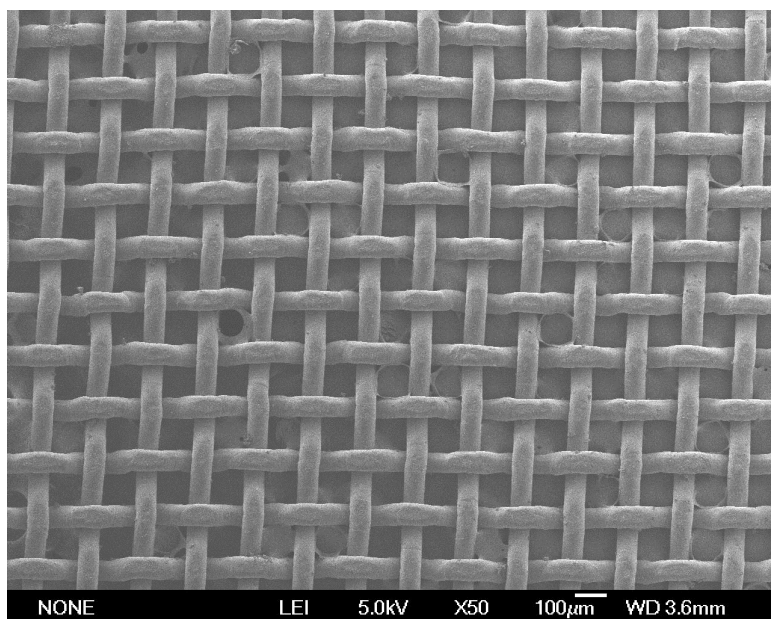

**Figure S1.** SEM image of stainless steel mesh.

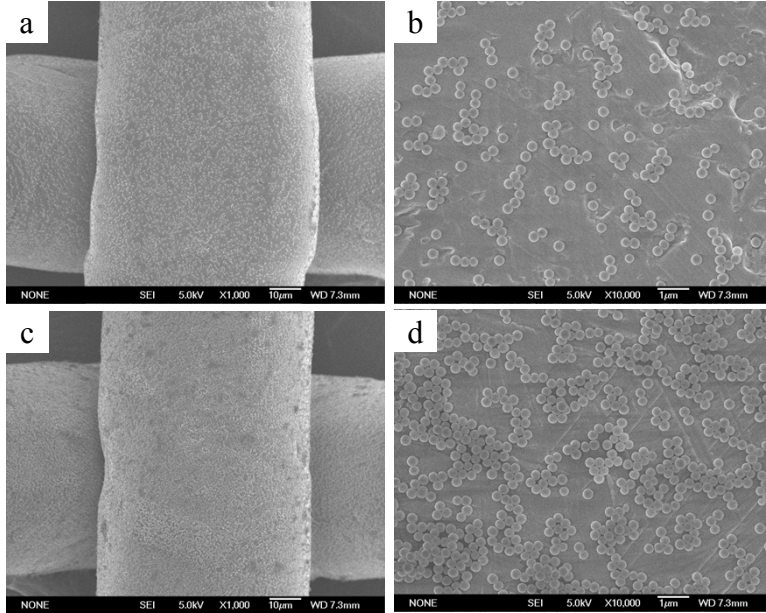

**Figure S2.** SEM images of stainless steel mesh coated with 250 nm nanoparticles by one (a,b) and two (c,d) assembling cycles

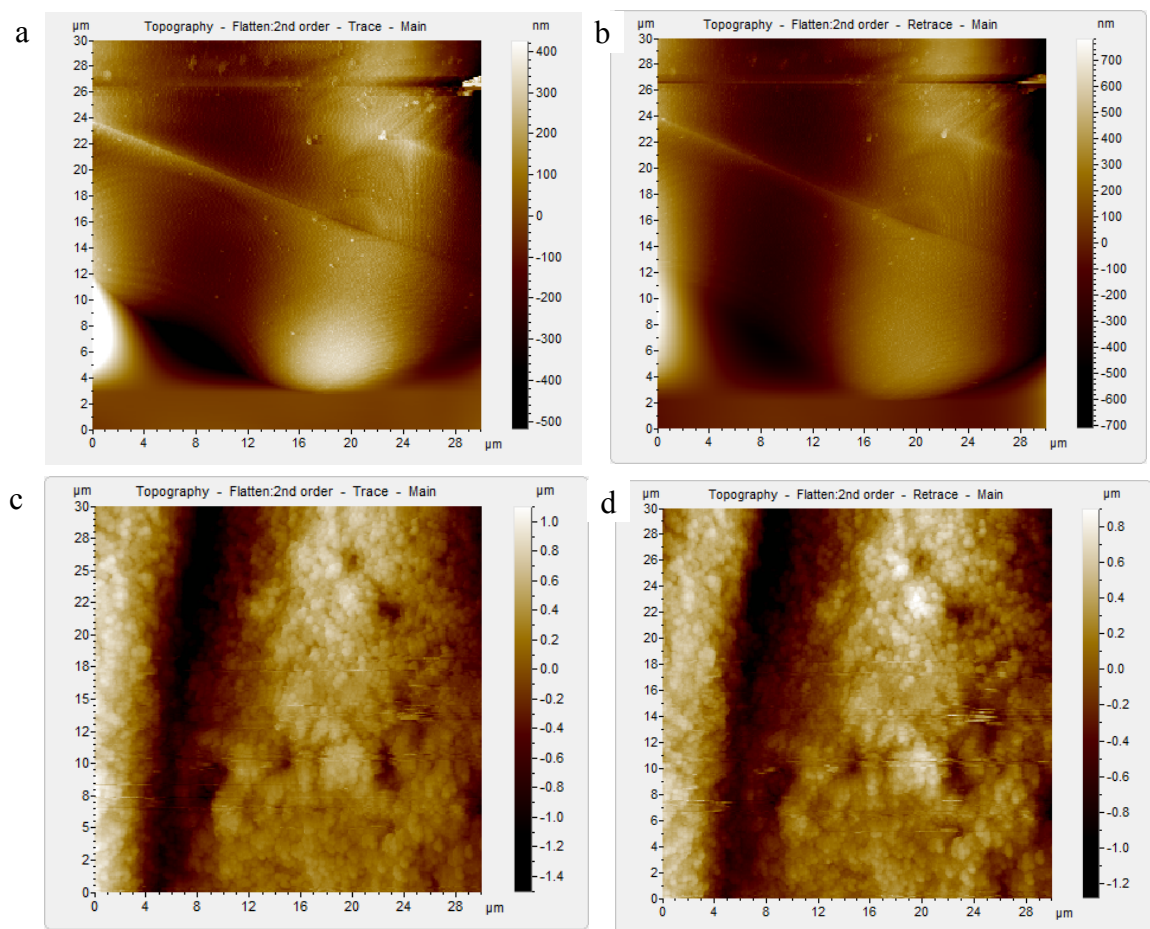

**Figure S3.** AFM images of the blank mesh (a,b) and the mesh with 3+1 deposition cycles plus hydrophobic modification (c,d). (n+m denotes n deposition cycles of 250 nm nanoparticles and m deposition cycles of 25 nm SiO<sub>2</sub> nanoparticles to form the bilayer on the mesh surface. a and c are the trace signal imaging, b and d the retrace imaging).

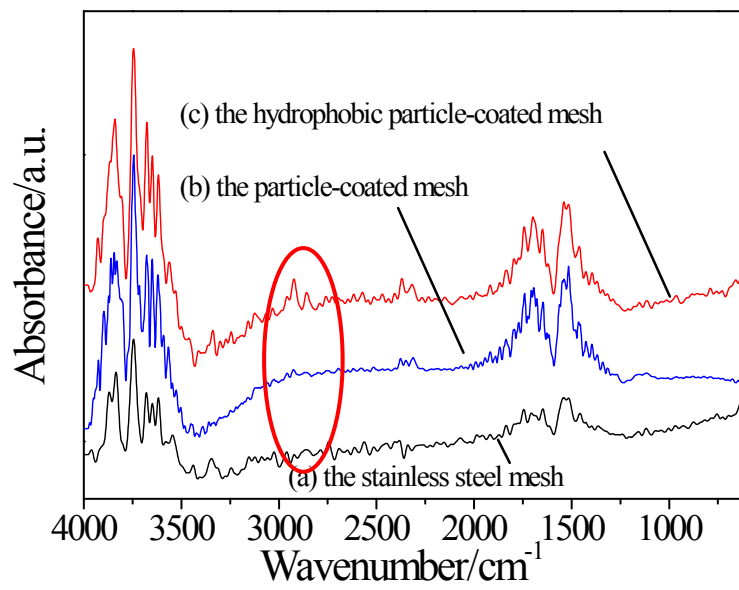

**Figure S4.** ATR-IR spectrum of blank stainless steel mesh (a), the mesh with 3+1 coating before (b) and after (c) hydrophobic modification.

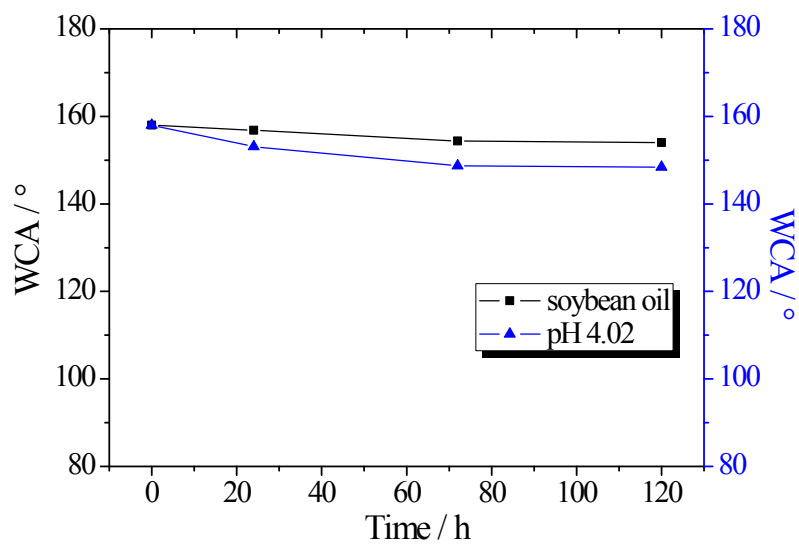

**Figure S5.** Variation of water contact angle (WCA) on the mesh with both particle coatings and hydrophobic modification subject to immersion into soybean oil and hydrochloric acid solution (pH 4.02 ) for different times.

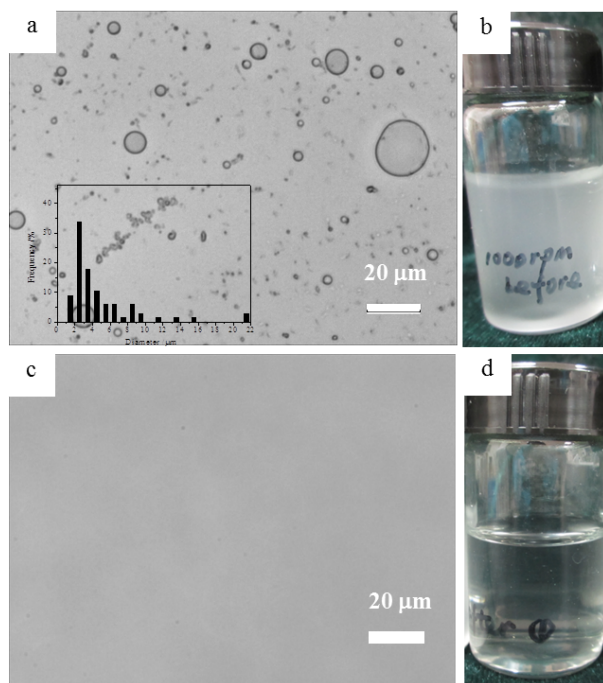

**Figure S6.** Features of the original emulsion (a-b) and emulsion filtered by the felt with 2+1 deposition cycles plus hydrophobic modification (c-d).

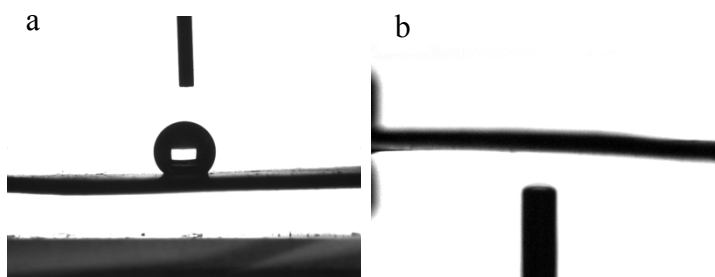

**Figure S7.** Digital images of WCA in air (a) and OWA under water (b) on the felt with 2+1 deposition cycles plus hydrophobic modification.

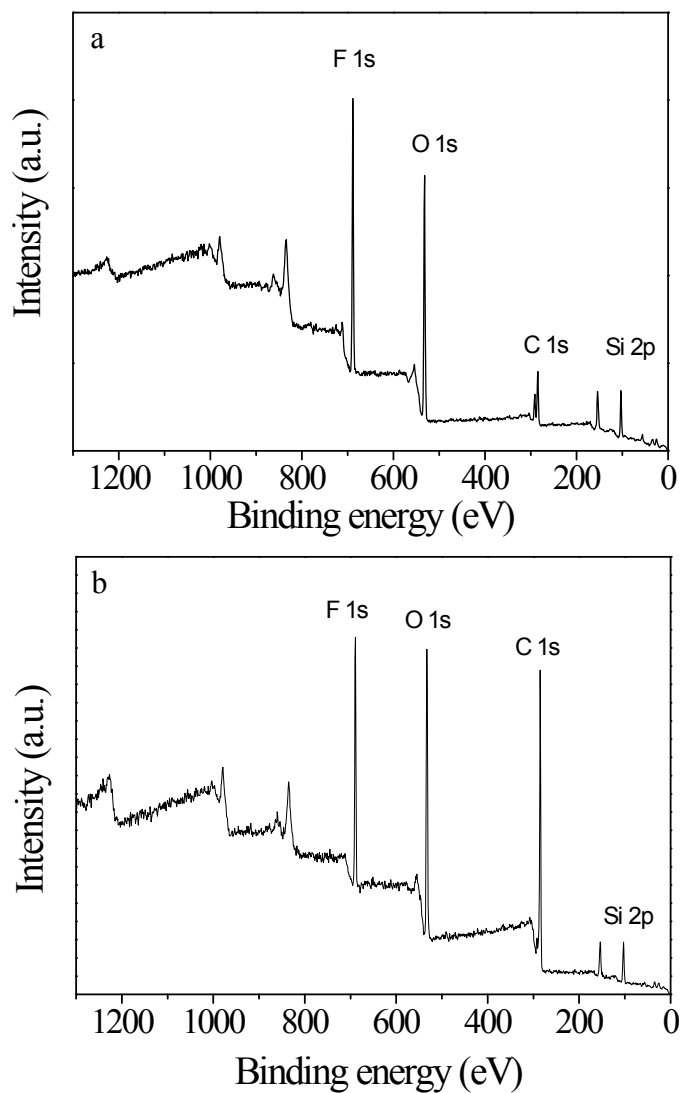

**Figure S8.** XPS spectrum of the felt with both particle coatings and hydrophobic (POTS) modification as prepared (a), and after 20 times use for oil/water emulsion separation followed by thorough washing (b).
